# Supplementary material
Source: PubMed Central journal article supplement (PMC404084)

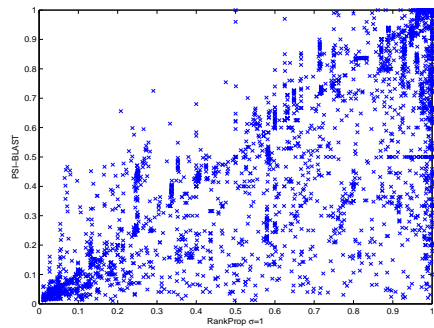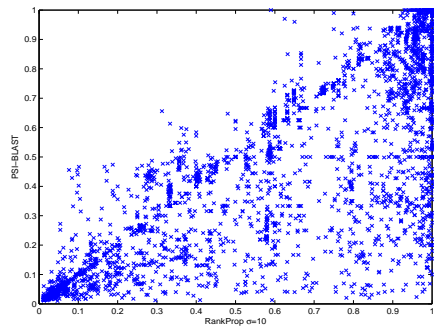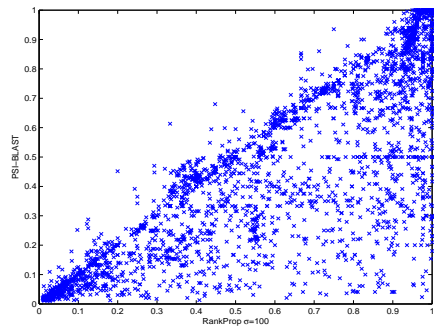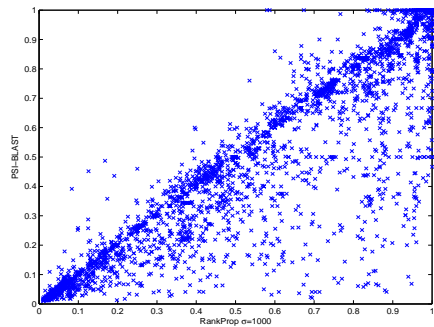

Supplement: pnas_101_17_6559__1.pdf [file pnas_101_17_6559__1.pdf]

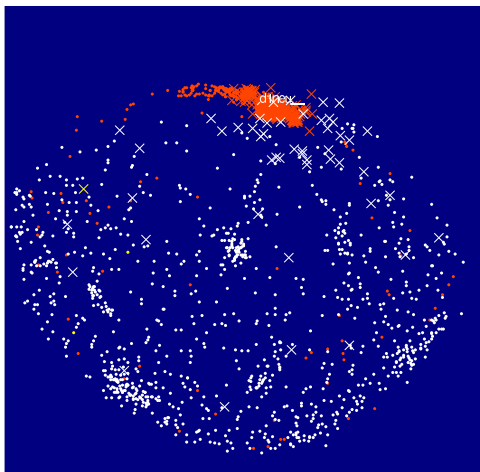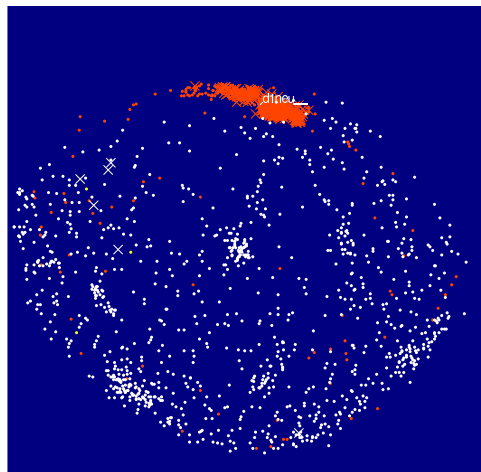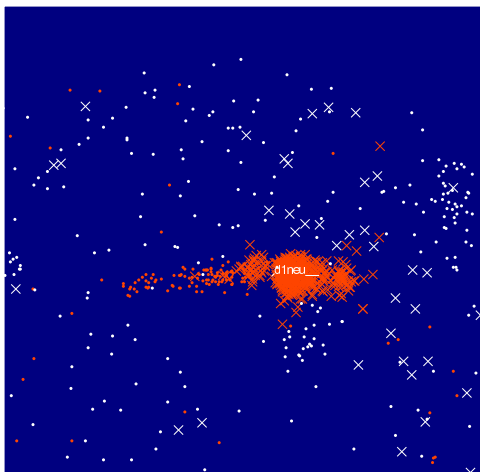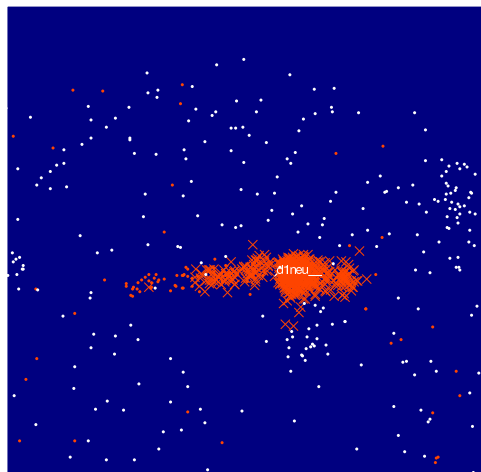

PSI-BLAST

RankProp

Supplement: pnas_101_17_6559__10.pdf [file pnas_101_17_6559__10.pdf]

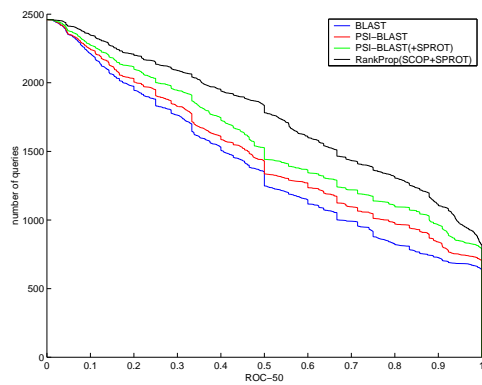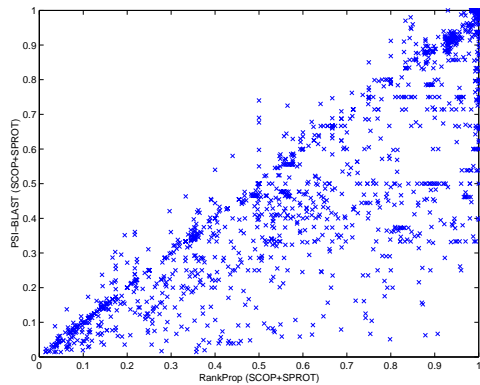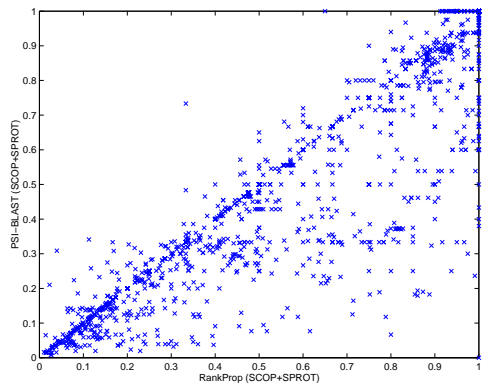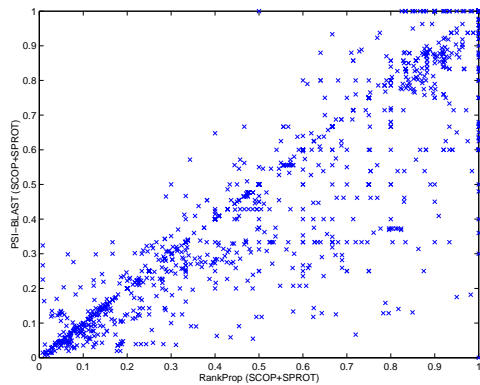

Supplement: pnas_101_17_6559__11.pdf [file pnas_101_17_6559__11.pdf]

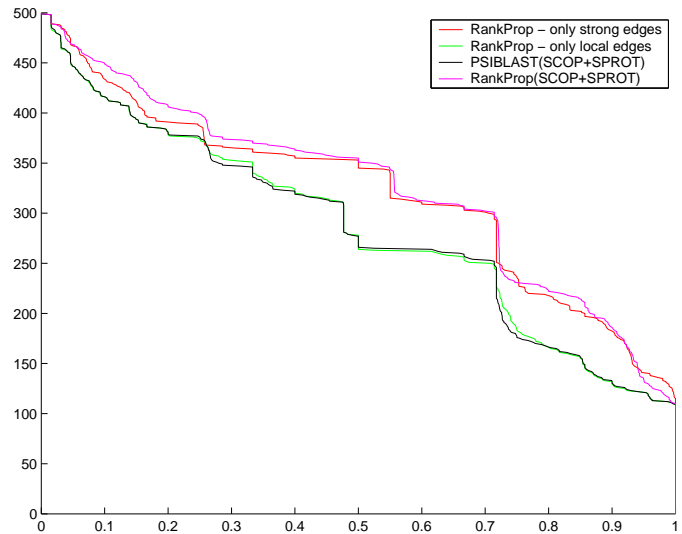

Supplement: pnas_101_17_6559__12.pdf [file pnas_101_17_6559__12.pdf]

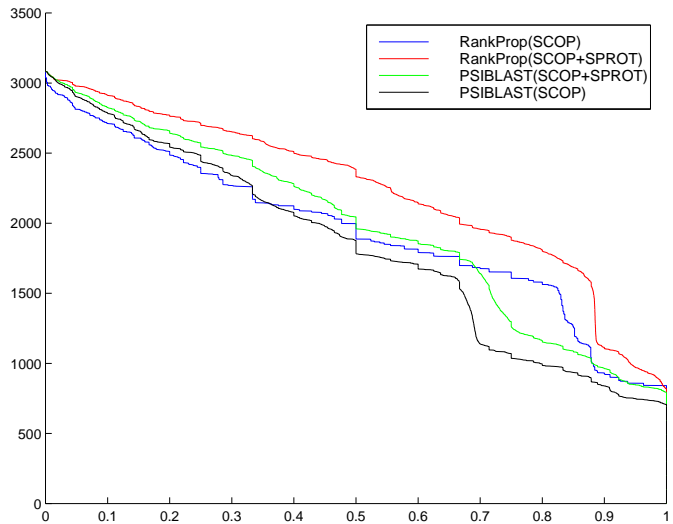

Supplement: pnas_101_17_6559__13.pdf [file pnas_101_17_6559__13.pdf]

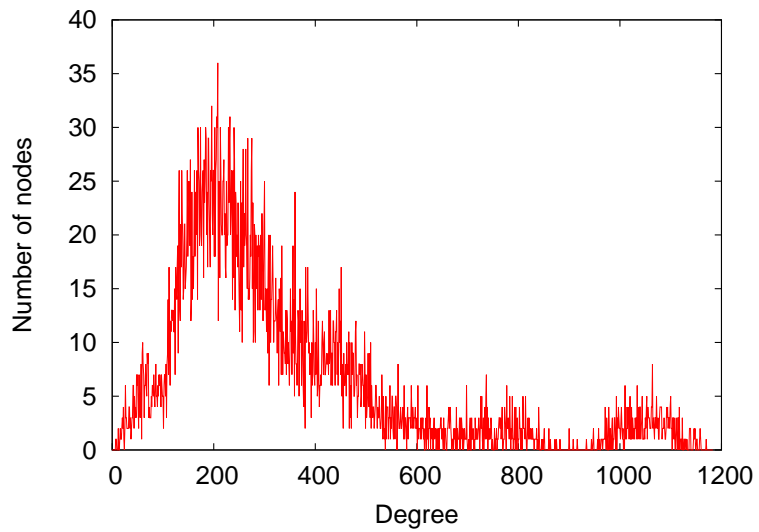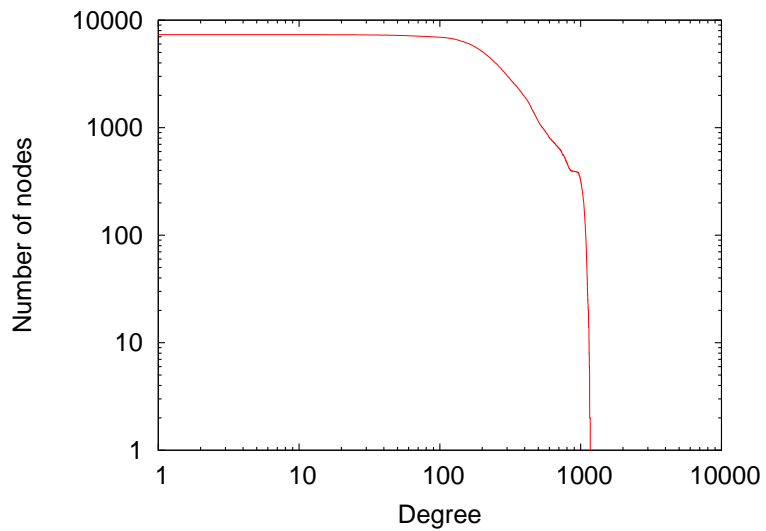

Supplement: pnas_101_17_6559__14.pdf [file pnas_101_17_6559__14.pdf]

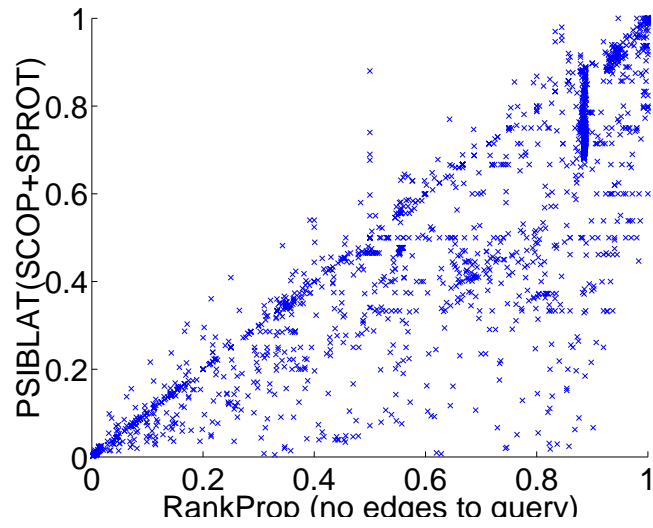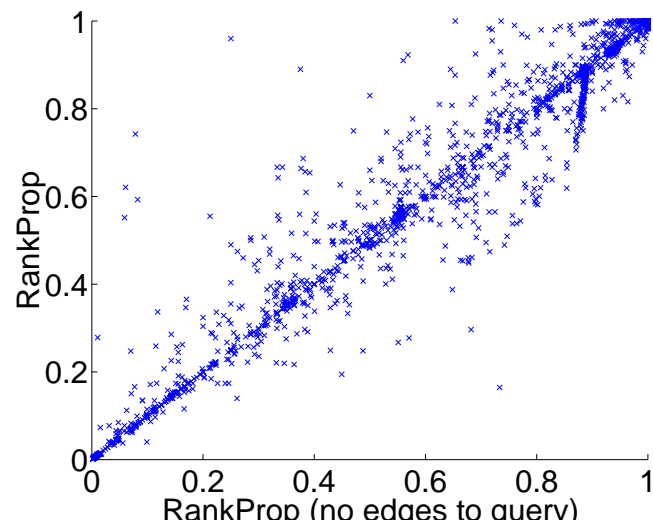

Supplement: pnas_101_17_6559__15.pdf [file pnas_101_17_6559__15.pdf]

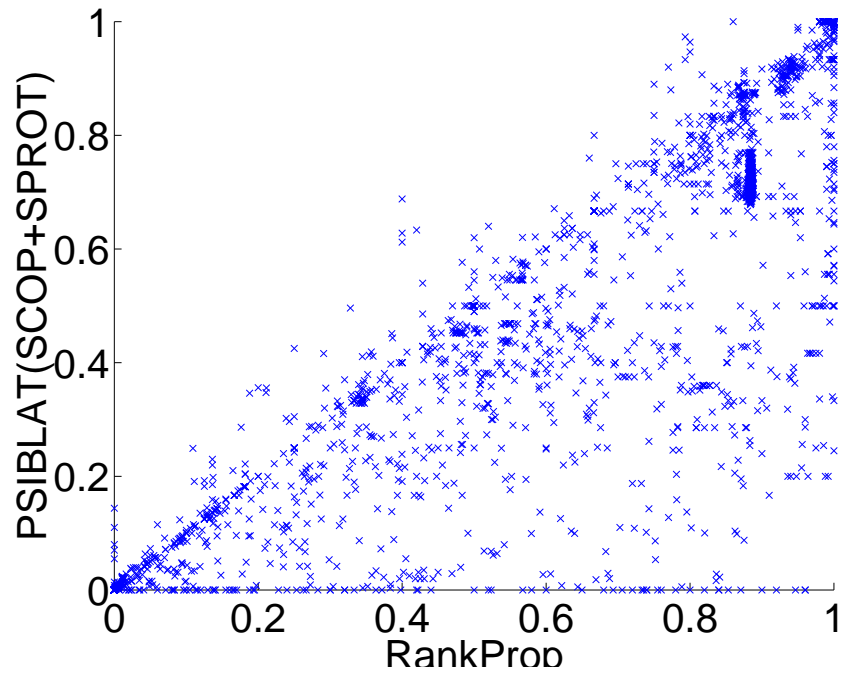

Supplement: pnas_101_17_6559__16.pdf [file pnas_101_17_6559__16.pdf]

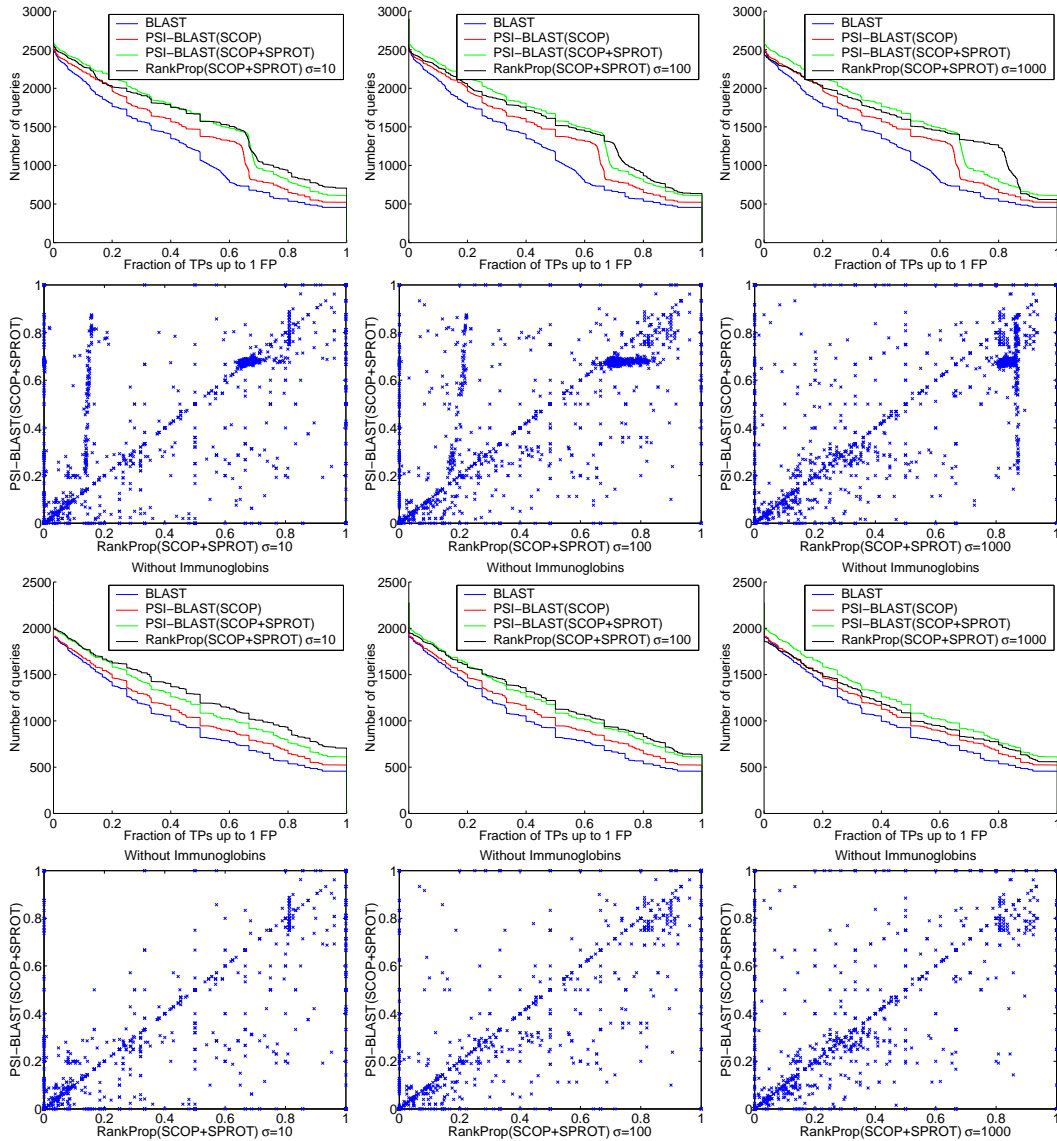

Supplement: pnas_101_17_6559__17.pdf [file pnas_101_17_6559__17.pdf]

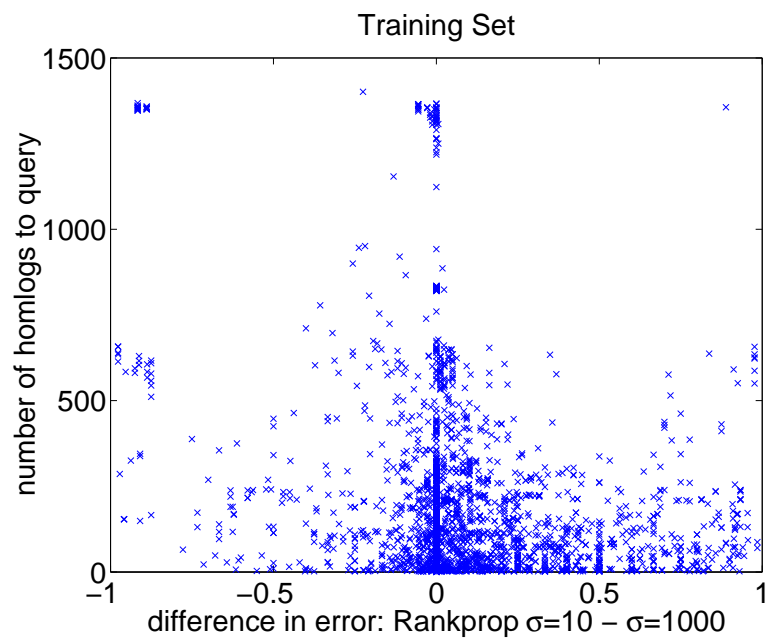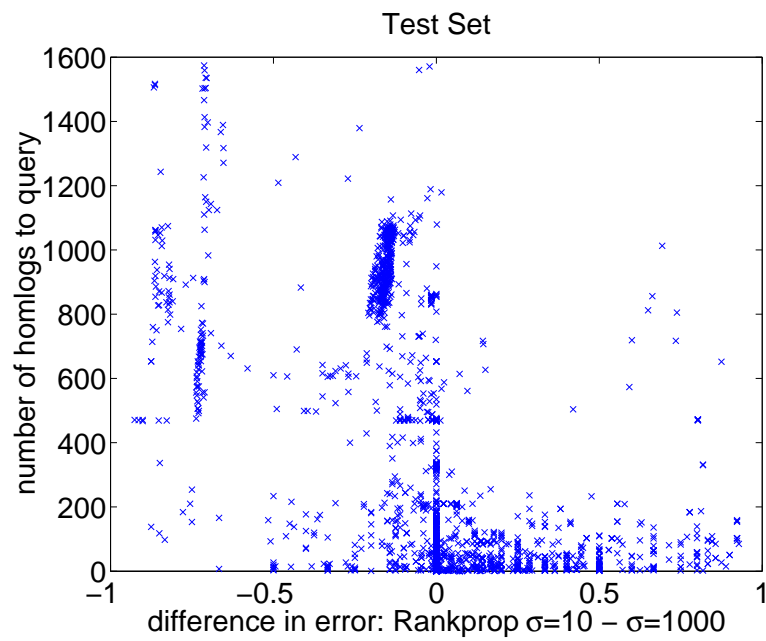

Supplement: pnas_101_17_6559__18.pdf [file pnas_101_17_6559__18.pdf]

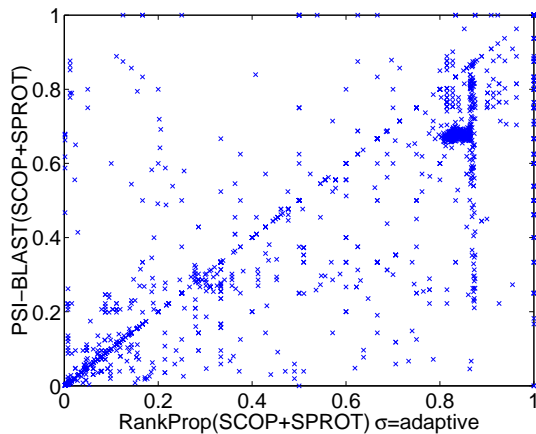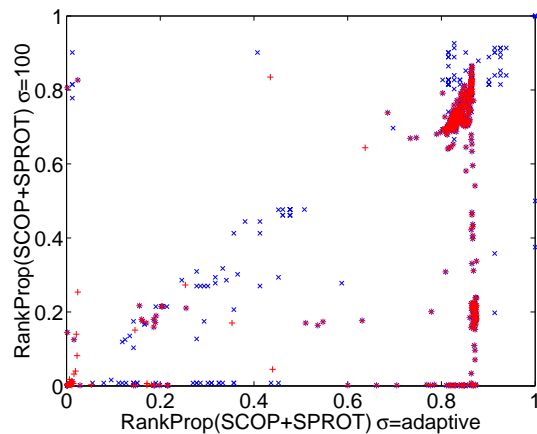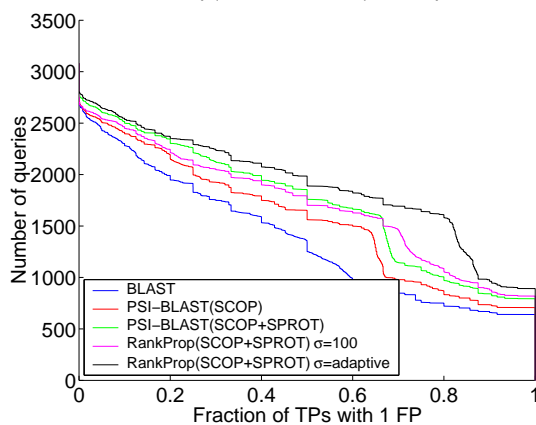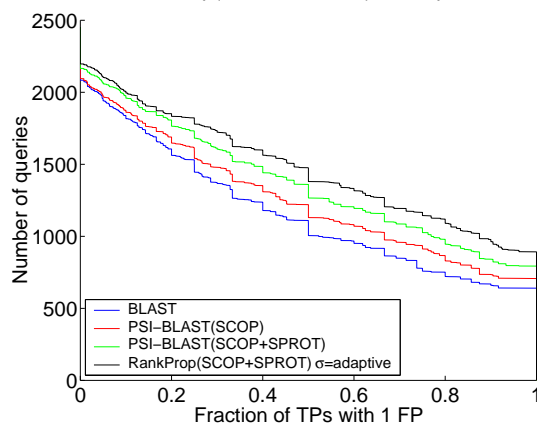

Supplement: pnas_101_17_6559__19.pdf [file pnas_101_17_6559__19.pdf]

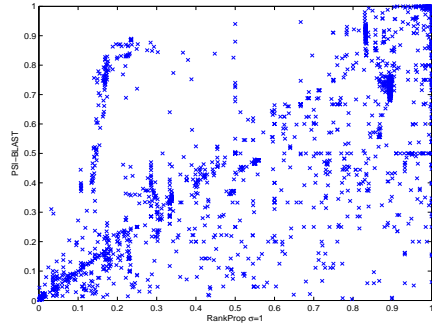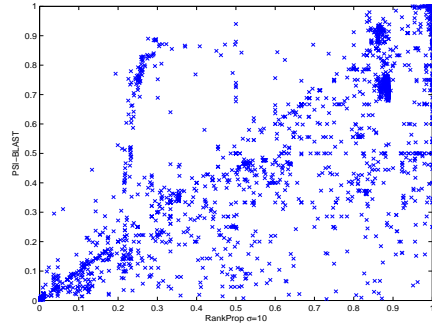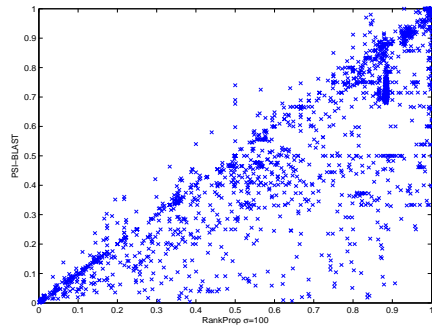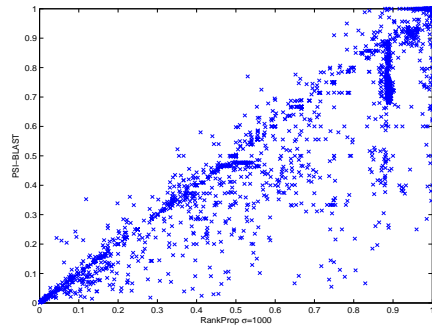

Supplement: pnas_101_17_6559__2.pdf [file pnas_101_17_6559__2.pdf]

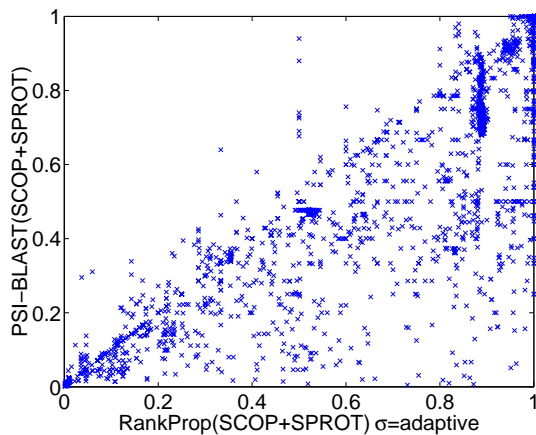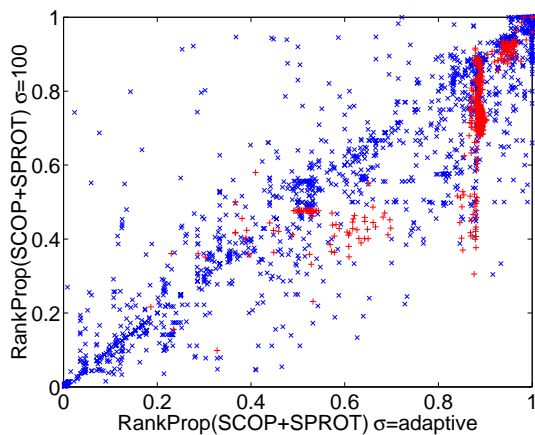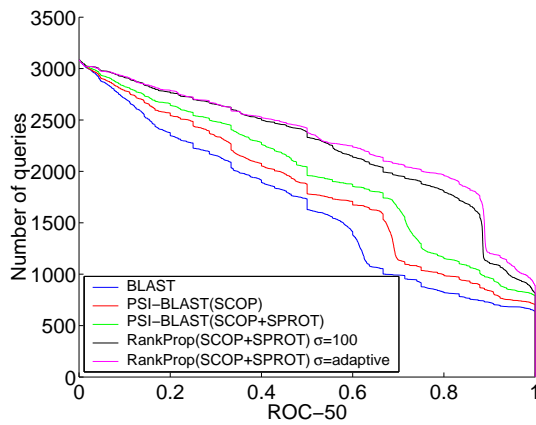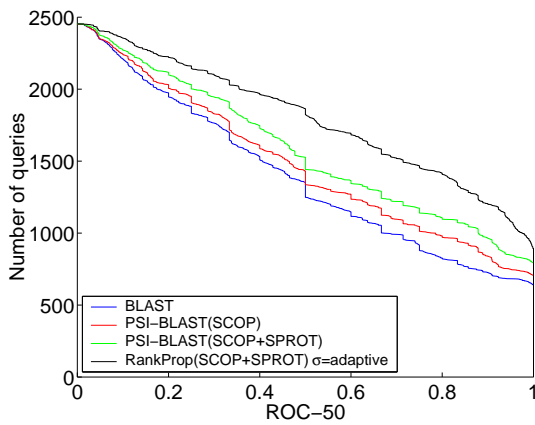

Supplement: pnas_101_17_6559__20.pdf [file pnas_101_17_6559__20.pdf]

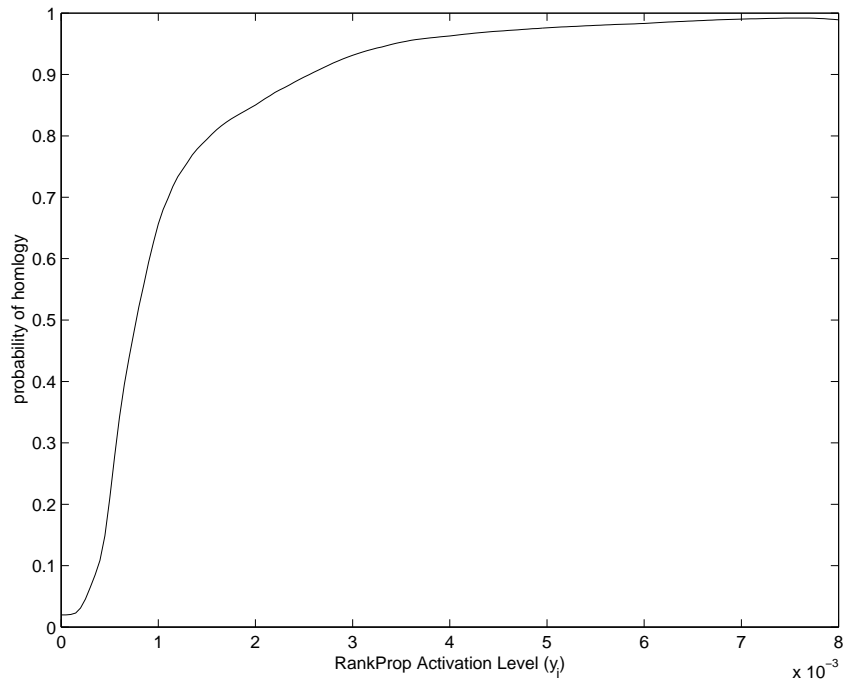

Supplement: pnas_101_17_6559__21.pdf [file pnas_101_17_6559__21.pdf]

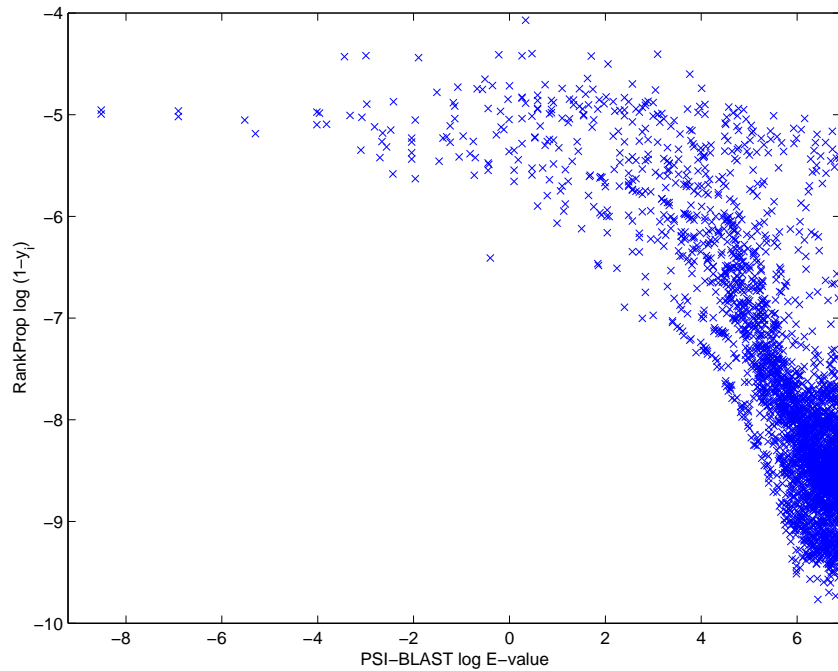

Supplement: pnas_101_17_6559__22.pdf [file pnas_101_17_6559__22.pdf]

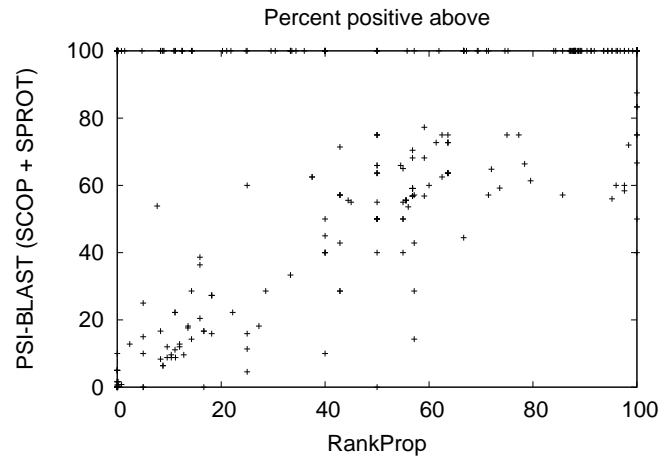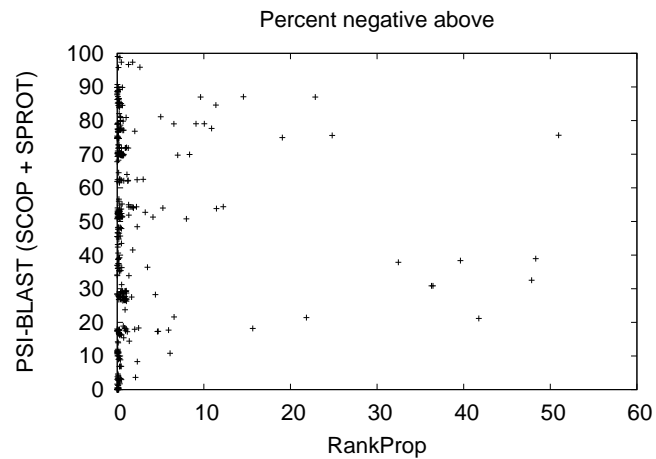

Supplement: pnas_101_17_6559__23.pdf [file pnas_101_17_6559__23.pdf]

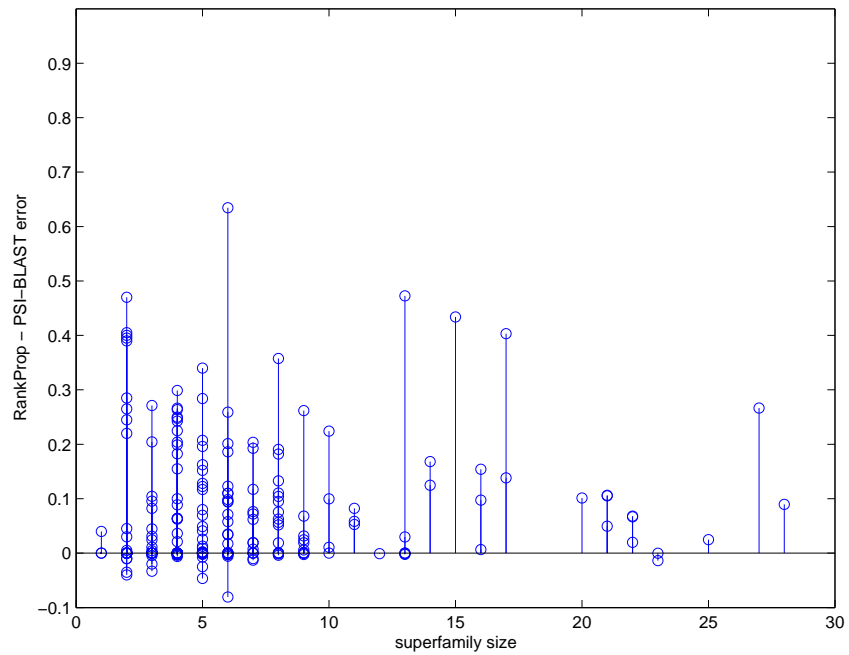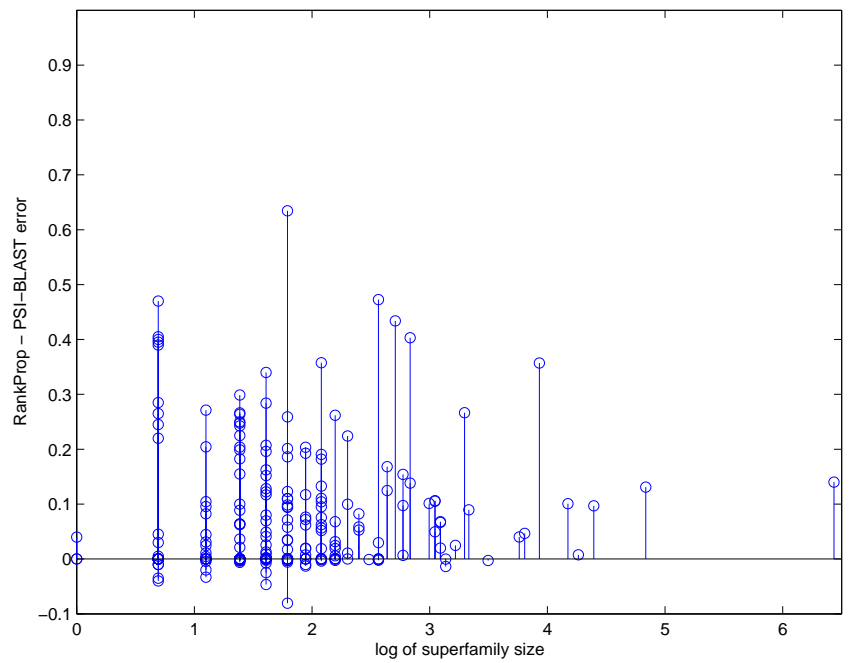

Supplement: pnas_101_17_6559__3.pdf [file pnas_101_17_6559__3.pdf]

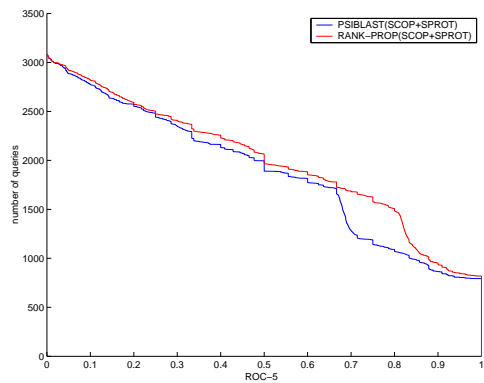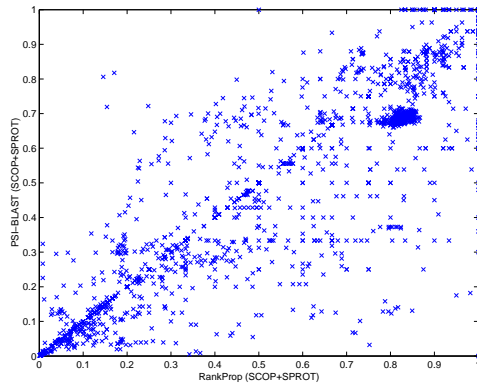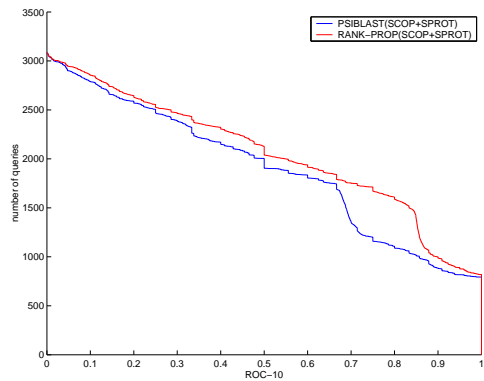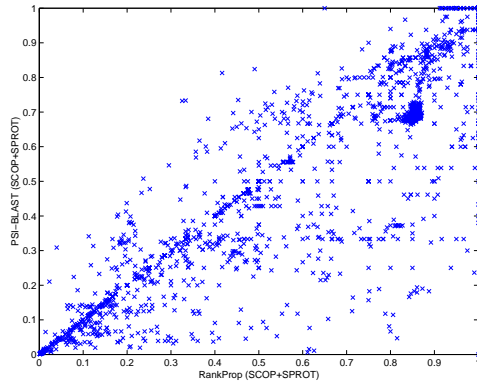

Supplement: pnas_101_17_6559__4.pdf [file pnas_101_17_6559__4.pdf]

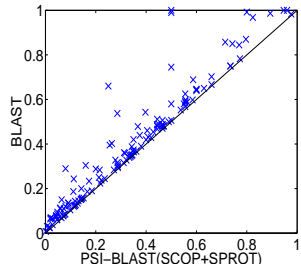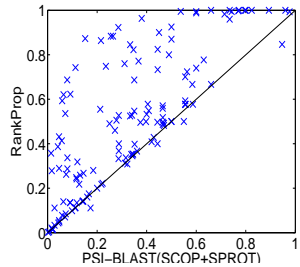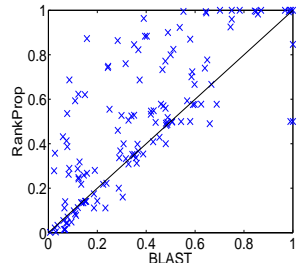

Supplement: pnas_101_17_6559__5.pdf [file pnas_101_17_6559__5.pdf]

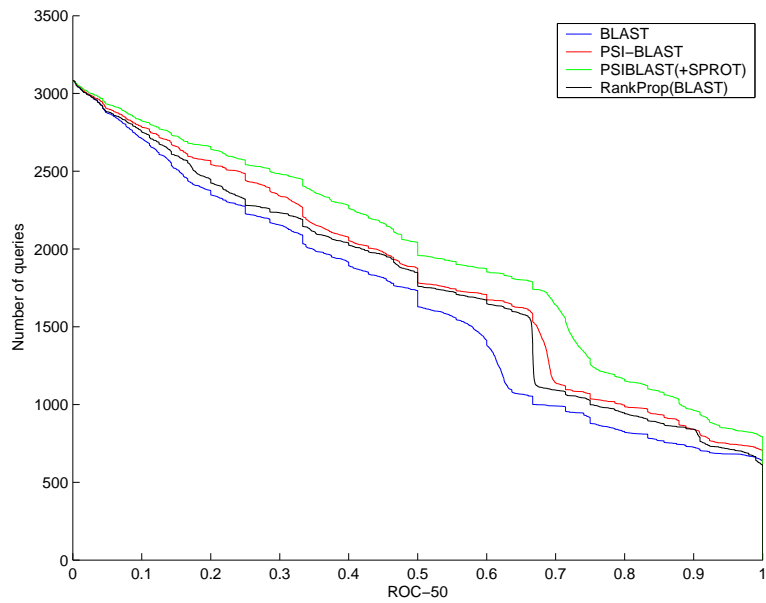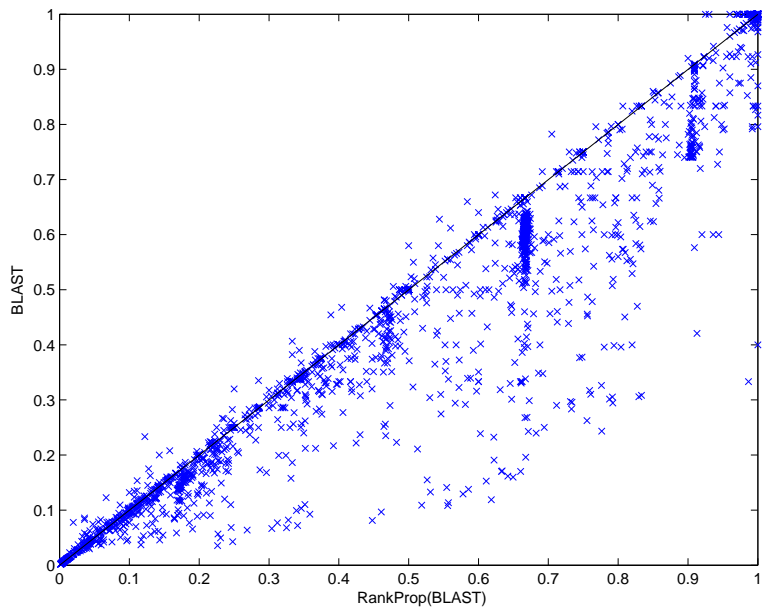

Supplement: pnas_101_17_6559__6.pdf [file pnas_101_17_6559__6.pdf]

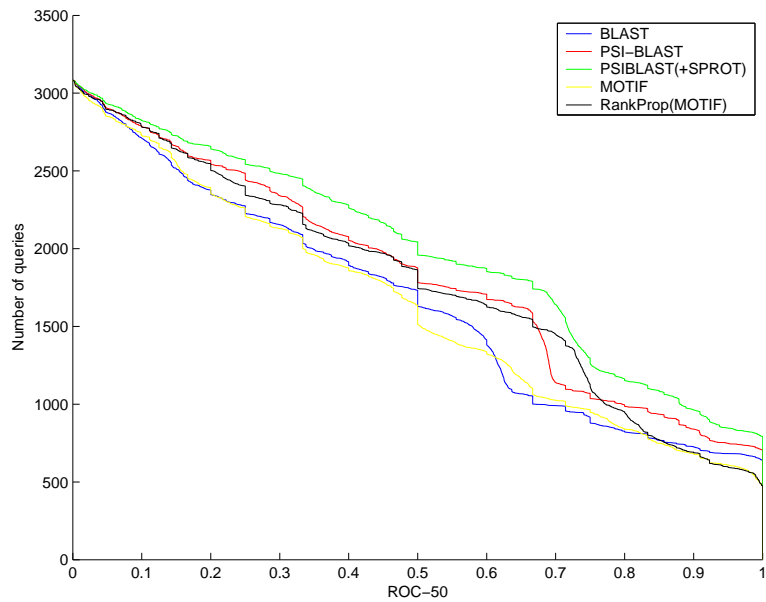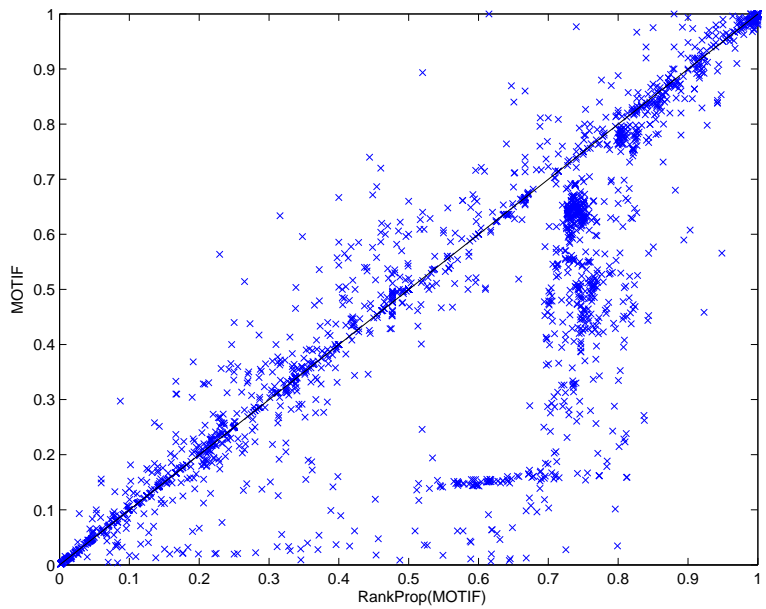

Supplement: pnas_101_17_6559__7.pdf [file pnas_101_17_6559__7.pdf]

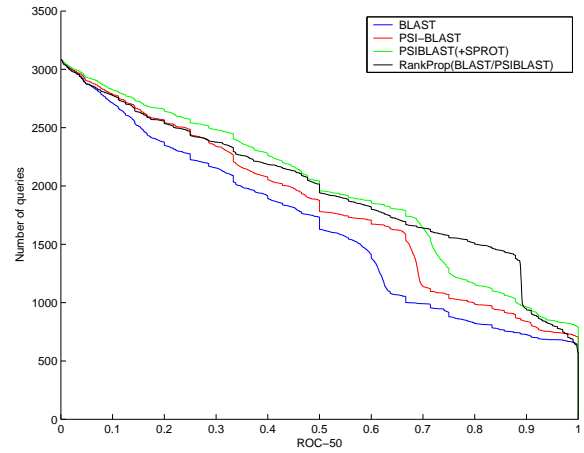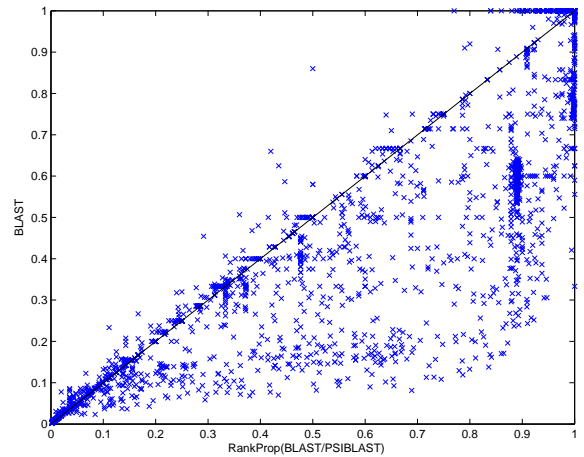

Supplement: pnas_101_17_6559__8.pdf [file pnas_101_17_6559__8.pdf]

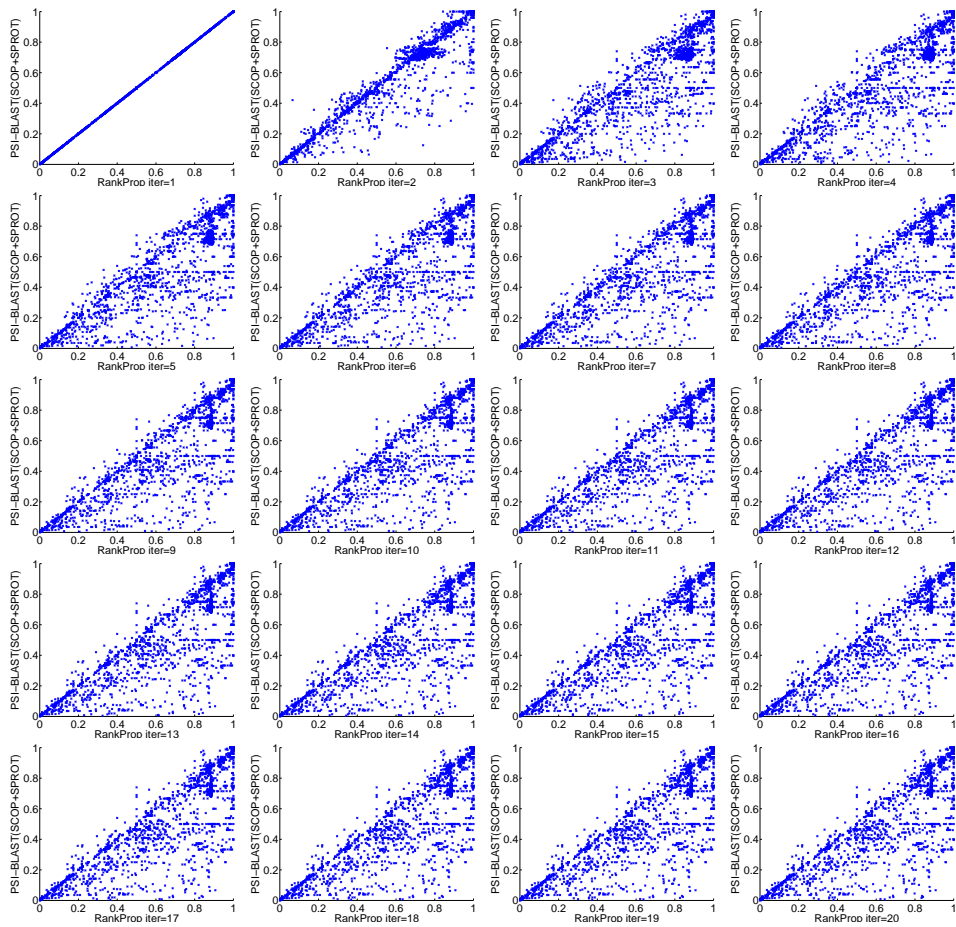

Supplement: pnas_101_17_6559__9.pdf [file pnas_101_17_6559__9.pdf]
